# Supplementary material for: The effects of bisphosphonate and radiation therapy in bone-metastatic lung adenocarcinoma: the impact of KRAS mutation
Source: PubMed Central journal article supplement — Transl Lung Cancer Res. 2021 Feb;10(2):675–84. doi: 10.21037/tlcr-20-754 (PMC7947398; doi:10.21037/tlcr-20-754), 2021-02
Supplement: tlcr-10-02-675-supplementary.pdf [file tlcr-10-02-675-supplementary.pdf]

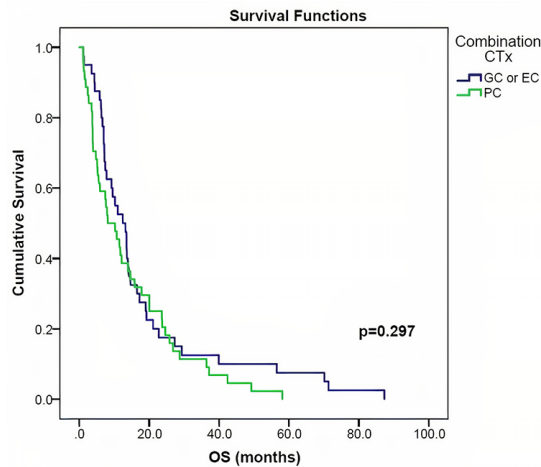

**Figure S1** Kaplan-Meier plots for OS in patients with bone metastatic LADC according to combination CTx. The OS did not differ significantly between patients treated with PC *vs.* GC or EC (median OSs were 8.1 *vs.* 12.4 months, respectively;  $P=0.297$ , log-rank test). BTx, bisphosphonate therapy; LADC, lung adenocarcinoma; OS, overall survival; PC, paclitaxel and carboplatin; GC, gemcitabine and cisplatin; EC, etoposide and cisplatin.

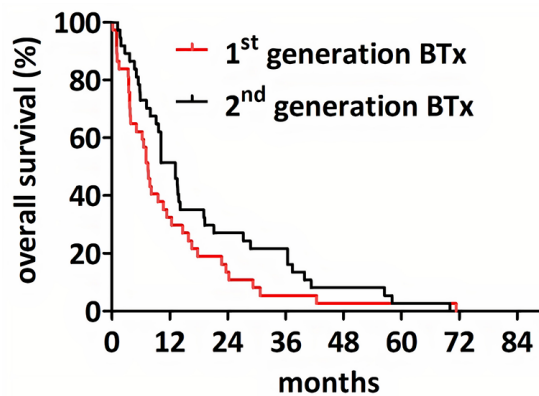

**Figure S2** Kaplan-Meier estimates for OS in bone metastatic LADC patients according to different generations of BTx. LADC patients receiving second-generation BTx had significantly increased median OS (*vs.* those treated with first-generation BTx, median OSs were 13.2 *vs.* 7.1 months, respectively;  $P=0.041$ , Gehan-Breslow-Wilcoxon test). BTx, bisphosphonate therapy; LADC, lung adenocarcinoma; OS, overall survival.
